# Supplementary material
Source: PubMed Central journal article supplement (PMC2689970)
Supplement: pp.109.136614_1.pdf [file pp.109.136614_1.pdf]

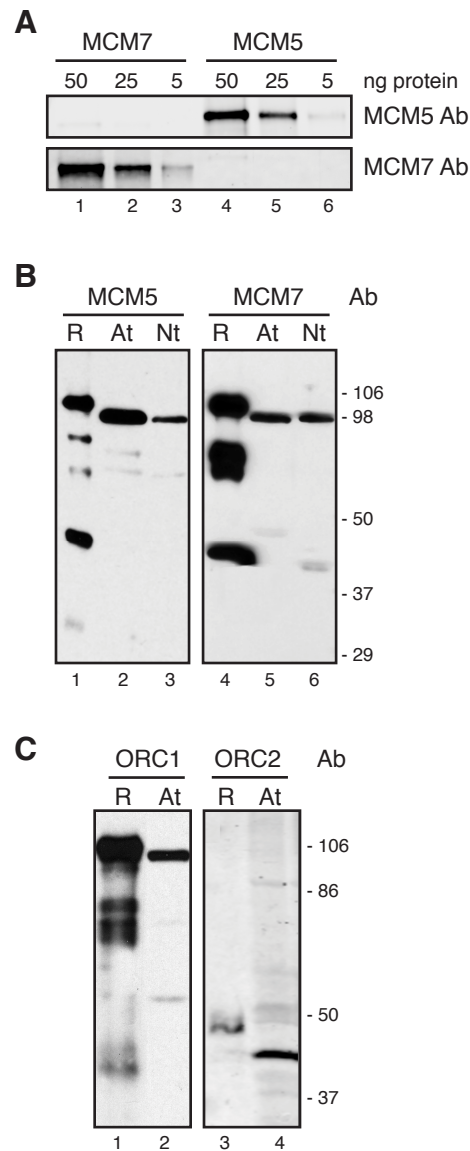

**Figure S1.** Antibody characterization. (A) Purified recombinant MCM7 (lanes 1-3) and MCM5 (lanes 4-5) were resolved by SDS-PAGE and the blots were probed with anti-MCM5 (top) and anti-MCM7 (bottom) antibodies. Three quantities of recombinant protein were loaded 50 ng (lanes 1 and 4), 25 ng (lanes 2 and 5), and 5 ng (lanes 3 and 6). (B) Total protein extract (50  $\mu$ g) from Arabidopsis (lanes 2 and 5) and tobacco (lanes 3 and 6) cultured cells as well as purified recombinant (25 ng) MCM5 (lane 1) and MCM 7 (lane 4) were resolved by SDS-PAGE, and the blots were probed with anti-MCM5 (left) and anti-MCM7 (right) antibodies. (C) Total protein extract (50  $\mu$ g) from Arabidopsis culture cells (lanes 2 and 4) and purified recombinant (25 ng) ORC1 (lane 1) and ORC2 (lane 3) were resolved by SDS-PAGE, and the blots were probed with anti-ORC1 (left) and anti-ORC2 (right) antibodies.

**Table S1.** *Clones generated for this study*

| Clone ID                | Gene                            | Vector backbone | Description                   | Primers            |
|-------------------------|---------------------------------|-----------------|-------------------------------|--------------------|
| RS91C                   | AtORC1                          | pENTR/D-TOPO    | Entry clone                   | prRS68F<br>prRS68R |
| RS175                   | AtORC1                          | pDEST17         | 6XHis-tag<br>expression clone |                    |
| RS75B                   | AtORC2                          | pENTR/D-TOPO    | Entry clone                   | prRS76F<br>prRS76R |
| RS94A                   | AtORC2                          | pET-DEST42      | 6XHis-tag<br>expression clone |                    |
| RS124E                  | AtMCM5                          | pENTR/SD/D-TOPO | Entry clone                   | prRS107<br>prRS124 |
| RS172A                  | AtMCM5                          | pET-DEST42      | 6XHis-tag<br>expression clone |                    |
| RS105A                  | AtMCM7                          | pENTR/SD/D-TOPO | Entry clone                   | prRS80F<br>prRS80R |
| RS106A                  | AtMCM7                          | pET-DEST42      | 6XHis-tag<br>expression clone |                    |
| <i>Primer sequences</i> |                                 |                 |                               |                    |
| prRS68F                 | 5'-CACCATGGCTTCTTCTCCGAGTTC     |                 |                               |                    |
| prRS68R                 | 5'-GAAGTAATTGGCCAACCATGGAAGAT   |                 |                               |                    |
| prRS76F                 | 5'-CACCATGGAGGACATTGAGAACATAGAA |                 |                               |                    |
| prRS76R                 | 5'-CTGATTGAGATCAAGCAAAAGCTGTTCG |                 |                               |                    |
| prRS107                 | 5'-CACCATGTCAGGATGGGACGAAGG     |                 |                               |                    |
| prRS124                 | 5'-AGCTTTGCGGACAATAGAACGTCTCT   |                 |                               |                    |
| prRS80F                 | 5'-CACCATGAAAGACCACGATTTTCGAC   |                 |                               |                    |
| prRS80R                 | 5'-GATAAAACGGATGTCAAAGGTGTGAGGT |                 |                               |                    |

**Table S2.** *Primers used for real-time RT-PCR*

| Gene                | Primer Sequence                                              |
|---------------------|--------------------------------------------------------------|
| UBC (At5g25760)     | 5'-TGGACCGCTCTTATCAAAGG<br>5'-GGCGAGGCGTGTATACATTT           |
| CYCB1;1 (At4g37490) | 5'-GGTTAAGCCAGTGCCTCGAAAAGAA<br>5'-GCAGAAGCAGCTACCATTGATGGAC |
| MCM2 (At1g44900)    | 5'-TTGCAATCTGGCTTGCGGAT<br>5'-TTGCTGCAGCTGAGGAAAGA           |
| MCM3 (At5g46280)    | 5'-GGTCCTCGCTGATAAAGGTATCGTG<br>5'-TCTTCTCTCGCGTAAGGCAAGCTC  |
| MCM4 (At2g16440)    | 5'-AGCTATGCCCCGCAAGAACAT<br>5'-TCCGTTGCTGATTGCTGCAT          |
| MCM5 (At2g07690)    | 5'-TGCAGCGGAAATATGTCACAATCAG<br>5'-TAATCGAGCTCCGATCCCCATTCTT |
| MCM6 (At5g44635)    | 5'-TTGCCCATCATATTGTGCGAGTTCA<br>5'-TGTCGTCCATGTTGTCACCATTAGC |
| MCM7 (At4g02060)    | 5'-GCCCTTCTTTCAAGATTCGATCTGC<br>5'-CTTCTTGCCTGATGCTGGAATAAGC |

**Table S3.** Relative expression values with error calculations for the data presented in Figure 1A

| Tissue               | Relative expression values (+/- standard error measurement) |      |              |      |              |      |              |      |              |      |              |      |              |      |
|----------------------|-------------------------------------------------------------|------|--------------|------|--------------|------|--------------|------|--------------|------|--------------|------|--------------|------|
|                      | MCM2                                                        |      | MCM3         |      | MCM4         |      | MCM5         |      | MCM6         |      | MCM7         |      | CYCB1;1      |      |
| cell culture         | 19.9 +/- 1.56                                               |      | 7.7 +/- 1.33 |      | 3.2 +/- 0.09 |      | 3.8 +/- 0.40 |      | 5.8 +/- 0.66 |      | 6.6 +/- 0.56 |      | 4.8 +/- 0.67 |      |
| seedling             | 1.0                                                         | 0.06 | 1.0          | 0.17 | 1.0          | 0.03 | 1.0          | 0.10 | 1.0          | 0.06 | 1.0          | 0.11 | 1.0          | 0.17 |
| shoot apex           | 3.6                                                         | 0.29 | 4.8          | 0.86 | 3.3          | 0.15 | 3.2          | 0.27 | 3.1          | 0.24 | 5.0          | 0.52 | 5.0          | 0.73 |
| elongating leaf      | 1.5                                                         | 0.08 | 1.6          | 0.47 | 1.3          | 0.06 | 1.2          | 0.14 | 1.5          | 0.12 | 1.5          | 0.13 | 1.0          | 0.15 |
| mature leaf          | 0.2                                                         | 0.02 | 0.3          | 0.05 | 0.3          | 0.03 | 0.3          | 0.04 | 0.2          | 0.02 | 0.3          | 0.04 | 0.1          | 0.01 |
| senescing leaf       | 0.3                                                         | 0.03 | 0.2          | 0.04 | 0.2          | 0.03 | 0.3          | 0.03 | 0.2          | 0.03 | 0.3          | 0.04 | 0.1          | 0.02 |
| cauline leaf (>2 cm) | 0.3                                                         | 0.05 | 0.3          | 0.05 | 0.3          | 0.01 | 0.3          | 0.02 | 0.2          | 0.02 | 0.4          | 0.04 | 0.1          | 0.02 |
| cauline leaf (<1 cm) | 0.8                                                         | 0.07 | 0.8          | 0.14 | 0.7          | 0.02 | 0.5          | 0.07 | 0.4          | 0.03 | 0.9          | 0.08 | 0.6          | 0.08 |
| flower bud           | 2.2                                                         | 0.14 | 1.9          | 0.40 | 2.1          | 0.17 | 1.8          | 0.15 | 1.7          | 0.18 | 2.6          | 0.29 | 4.6          | 0.71 |
| open flower          | 2.2                                                         | 0.19 | 1.4          | 0.31 | 2.0          | 0.09 | 1.4          | 0.13 | 0.9          | 0.08 | 2.1          | 0.18 | 3.3          | 0.59 |
| silique              | 0.3                                                         | 0.05 | 0.3          | 0.09 | 1.1          | 0.12 | 0.5          | 0.04 | 0.3          | 0.04 | 1.3          | 0.14 | 1.1          | 0.16 |

**Table S4.** *MCM genes are coordinately expressed*

|         | Correlation coefficient (Correl. coef. excluding cell culture) |            |            |            |            |            |            |
|---------|----------------------------------------------------------------|------------|------------|------------|------------|------------|------------|
|         | MCM2                                                           | MCM3       | MCM4       | MCM5       | MCM6       | MCM7       | CYCB1;1    |
| MCM2    | 1.00                                                           | 0.91(0.95) | 0.69(0.97) | 0.82(0.98) | 0.93(0.93) | 0.85(0.96) | 0.62(0.93) |
| MCM3    |                                                                | 1.00       | 0.89(0.93) | 0.97(0.99) | 0.99(0.98) | 0.98(0.97) | 0.8(0.84)  |
| MCM4    |                                                                |            | 1.00       | 0.96(0.97) | 0.87(0.91) | 0.96(0.98) | 0.96(0.95) |
| MCM5    |                                                                |            |            | 1.00       | 0.96(0.98) | 0.99(0.98) | 0.9(0.91)  |
| MCM6    |                                                                |            |            |            | 1.00       | 0.96(0.94) | 0.78(0.83) |
| MCM7    |                                                                |            |            |            |            | 1.00       | 0.89(0.92) |
| CYCB1;1 |                                                                |            |            |            |            |            | 1.00       |
